# Supplementary material for: Modelling Photoionisations in Tautomeric DNA Nucleobase Derivatives 7H-Adenine and 7H-Guanine: Ultrafast Decay and Photostability
Source: MDPI journal article supplement (doi:10.3390/photochem1020018), 2021-09-10
Supplement: s1 [file s1]

Archive with 1 entries (1 files):
- photochem-1355328-supplementary.pdf
